# Supplementary material for: Hysteretic thermal spin-crossover in heteroleptic Fe( ii ) complexes using alkyl chain substituted 2,2′-dipyridylamine ligands
Source: Royal Society of Chemistry journal article supplement (doi:10.1039/c9dt03412a), 2019-01-01
Supplement: c9dt03412a1.pdf [file c9dt03412a1.pdf]

## **Hysteretic thermal spin-crossover and in heteroleptic Fe(II) complexes using alkyl chain substituted 2,2'-dipyridylamine ligands.**

Blaise L. Geoghegan,<sup>a</sup> Wasinee Phonsri,<sup>b</sup> Peter. N. Horton,<sup>c</sup> James. B. Orton,<sup>c</sup> Simon. J. Coles,<sup>c</sup> Keith S. Murray,<sup>b</sup> Peter J. Cragg,<sup>a</sup> Marcus K. Dymond<sup>a</sup> and Ian A. Gass<sup>a\*</sup>

<sup>a</sup>School of Pharmacy and Biomolecular Sciences, Huxley Building, University of Brighton, Brighton, BN2 4GJ, England, UK.

<sup>b</sup>School of Chemistry, Building 23, Monash University, Clayton, Victoria, Australia.

<sup>c</sup>The UK National Crystallography Service, School of Chemistry, University of Southampton, Southampton, SO17 1BJ, UK.

E-mail: I.Gass@brighton.ac.uk

Supplementary Information

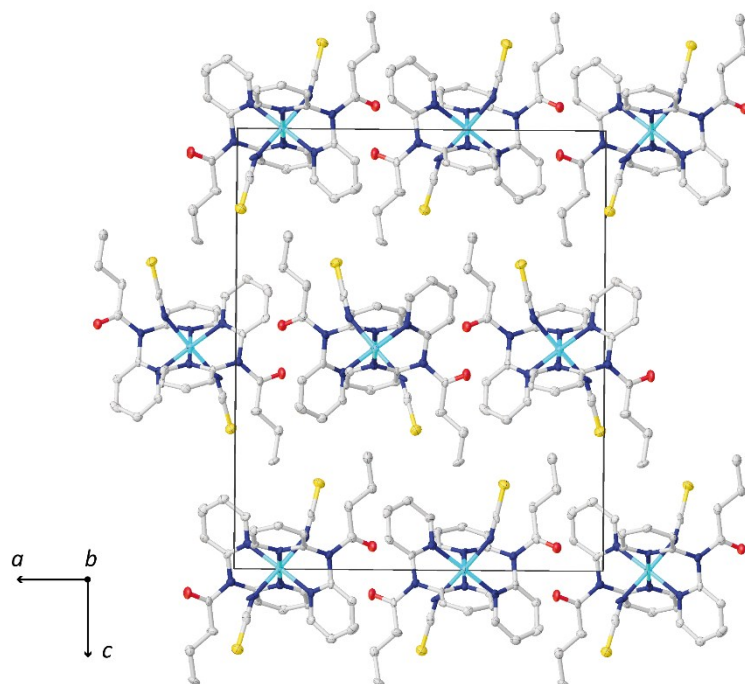

**Fig. S1** Unit cell of  $1C_4 \cdot 85K$  as viewed down the  $b$  axis. Legend: iron, turquoise; nitrogen, blue; carbon, grey; oxygen, red; sulfur, yellow. This is representative of the unit cell for  $1C_4 \cdot 120K$  and  $1C_4 \cdot 200K$ .

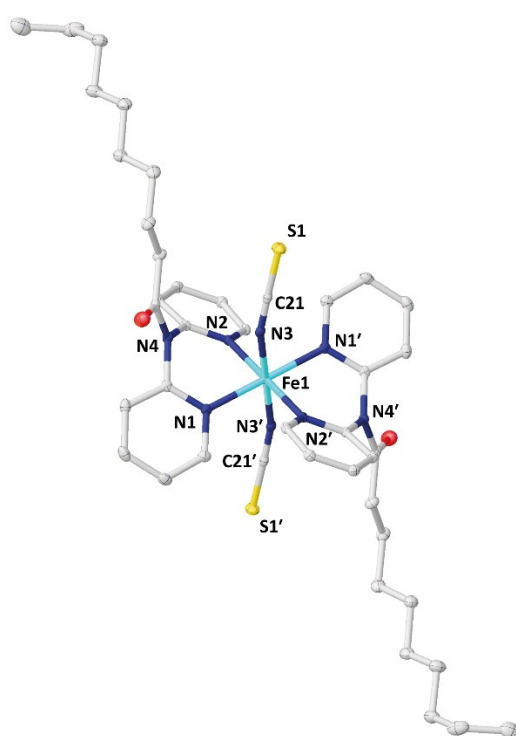

**Fig. S2** Molecular structure of  $1C_{10} \cdot 85K$  with selected atom labels. Hydrogen atoms omitted for clarity. Legend: iron, turquoise; nitrogen, blue; carbon, grey; oxygen, red; sulfur, yellow. The second  $LC_{10}$  unit is symmetry generated through an inversion centre on the Fe atom. ' labels denote atoms that are symmetry generated in this way. This is representative of the numbering in  $1C_{10} \cdot 105K$  and  $1C_{10} \cdot 140K$ .

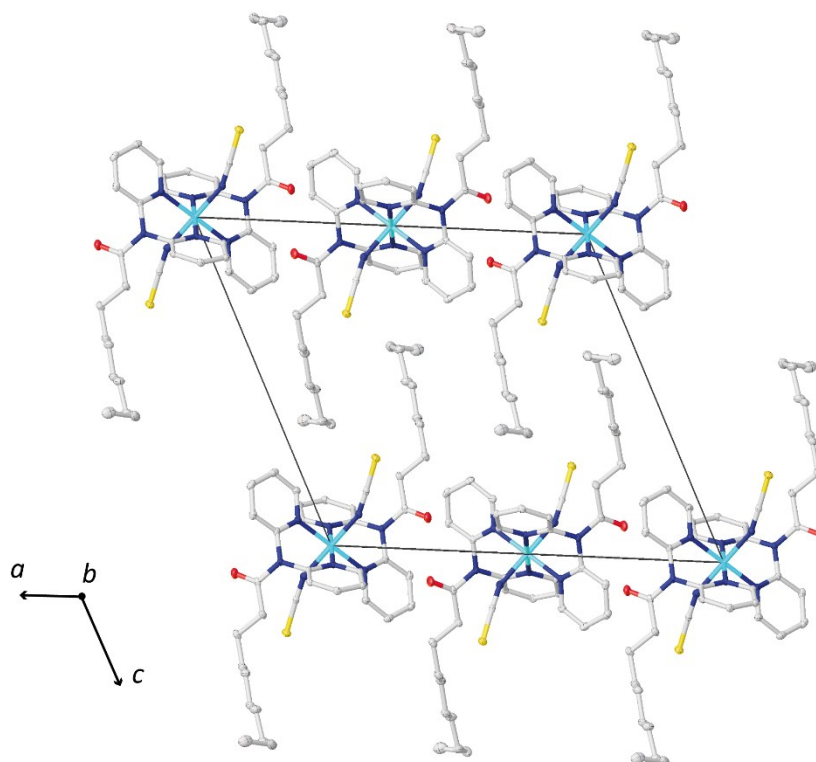

**Fig. S3** Unit cell of **1C<sub>10</sub>·85K** as viewed down the *b* axis. Legend: iron, turquoise; nitrogen, blue; carbon, grey; oxygen, red; sulfur, yellow.

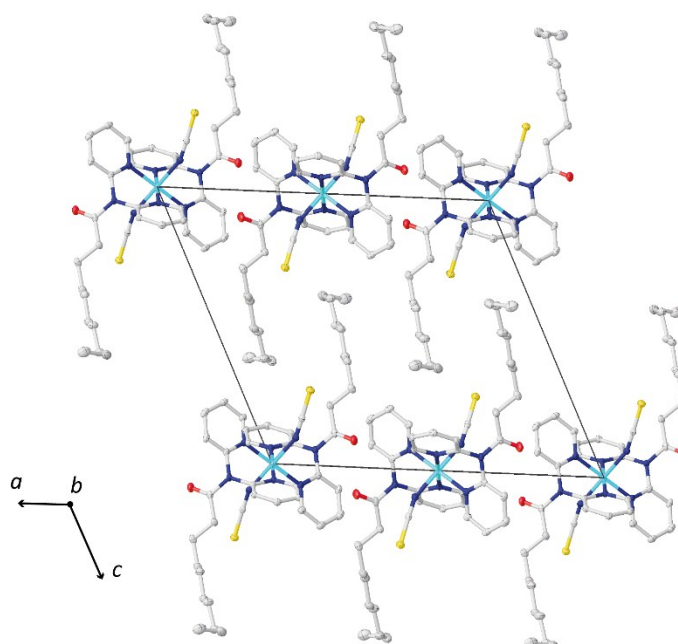

**Fig. S4** Unit cell of **1C<sub>10</sub>·105K** as viewed down the *b* axis. Legend: iron, turquoise; nitrogen, blue; carbon, grey; oxygen, red; sulfur, yellow.

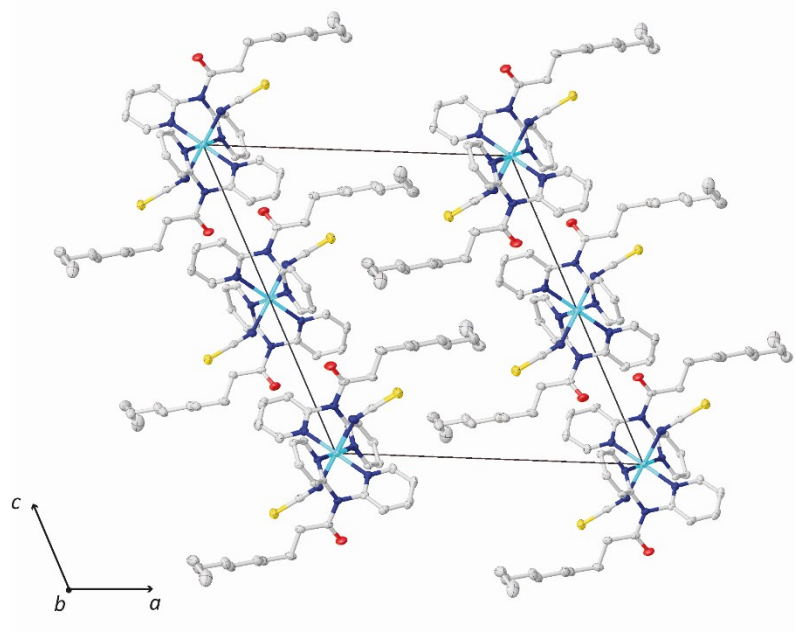

**Fig. S5** Unit cell of  $1\mathbf{C}_{10}\cdot\mathbf{140K}$  as viewed down the  $b$  axis. Legend: iron, turquoise; nitrogen, blue; carbon, grey; oxygen, red; sulfur, yellow.

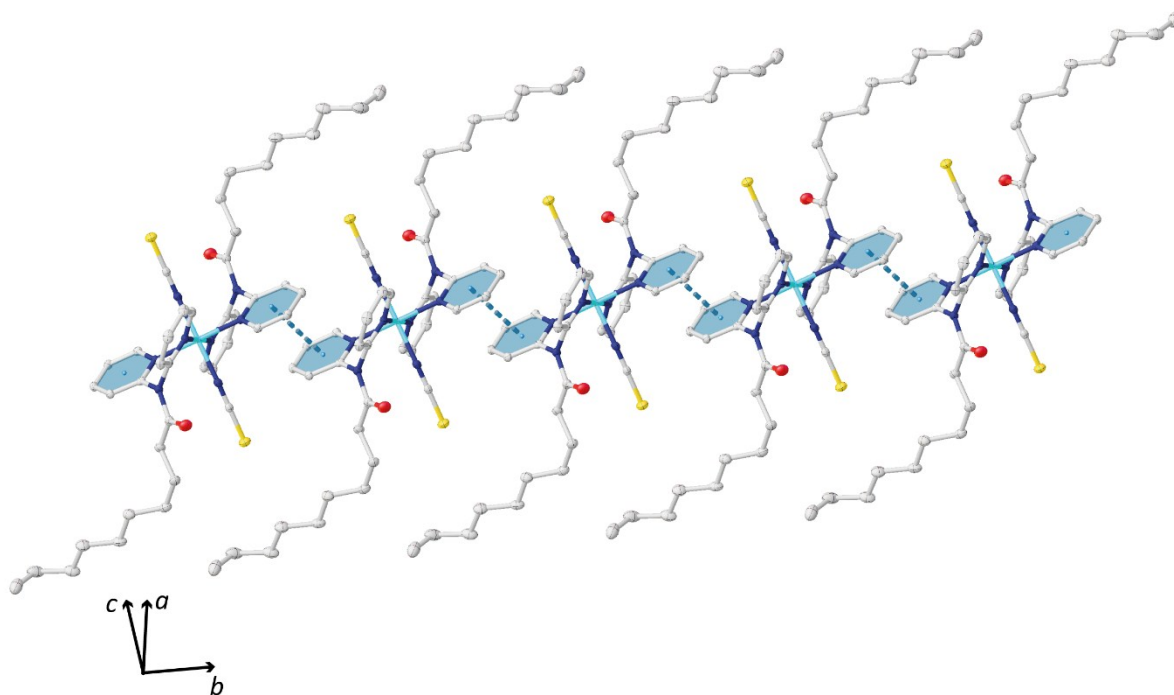

**Fig. S6** Short  $\pi\cdots\pi$  contacts in  $1\mathbf{C}_{10}\cdot\mathbf{105K}$ . Hydrogen atoms omitted for clarity. Legend: iron, turquoise; nitrogen, blue; carbon, grey; oxygen, red; sulfur, yellow. This is representative of the interactions found in  $1\mathbf{C}_{10}\cdot\mathbf{85K}$  and  $1\mathbf{C}_{10}\cdot\mathbf{140K}$ .

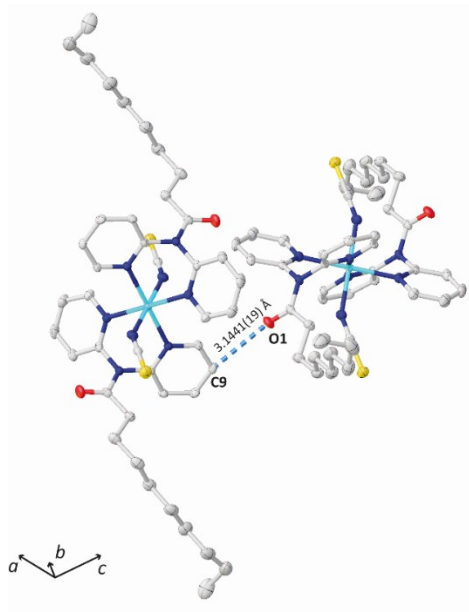

**Fig. S7** Short C-H...O contact between **1C<sub>10</sub>·140K** complexes. Hydrogen atoms omitted for clarity. Legend: iron, turquoise; nitrogen, blue; carbon, grey; oxygen, red; sulfur, yellow. This is representative of the interactions found in **1C<sub>10</sub>·85K** and **1C<sub>10</sub>·105K**.

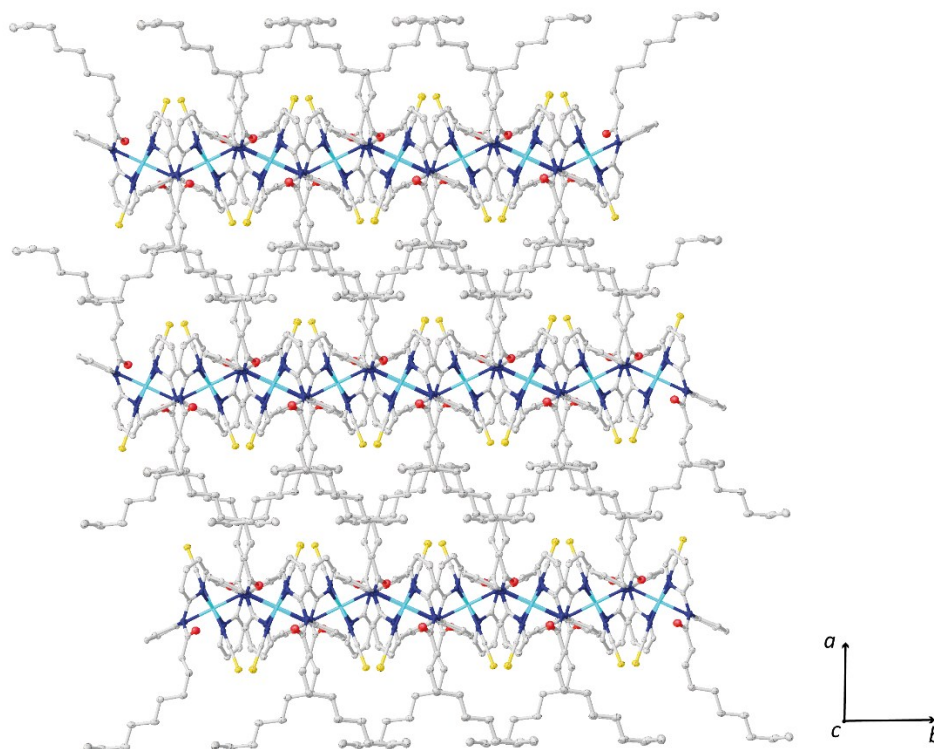

**Fig. S8** Packing of **1C<sub>10</sub>·105K** as viewed down the *c* axis. Legend: iron, turquoise; nitrogen, blue; carbon, grey; oxygen, red; sulfur, yellow. This is representative of the packing found in **1C<sub>10</sub>·85K** and **1C<sub>10</sub>·140K**.

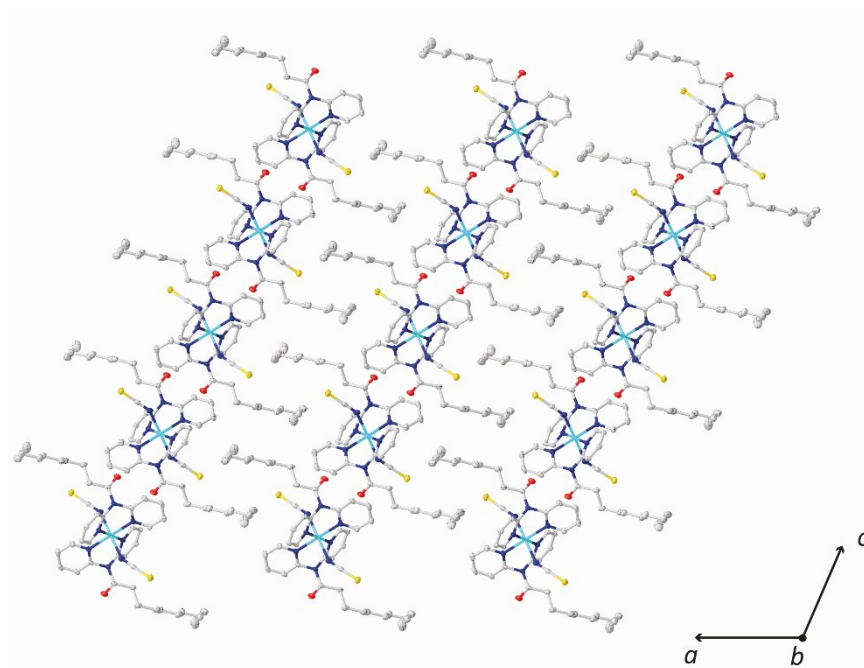

**Fig. S9** Packing of  $1C_{10}\cdot 140K$  as viewed down the  $b$  axis. Legend: iron, turquoise; nitrogen, blue; carbon, grey; oxygen, red; sulfur, yellow. This is representative of the packing found in  $1C_{10}\cdot 85K$  and  $1C_{10}\cdot 105K$ .

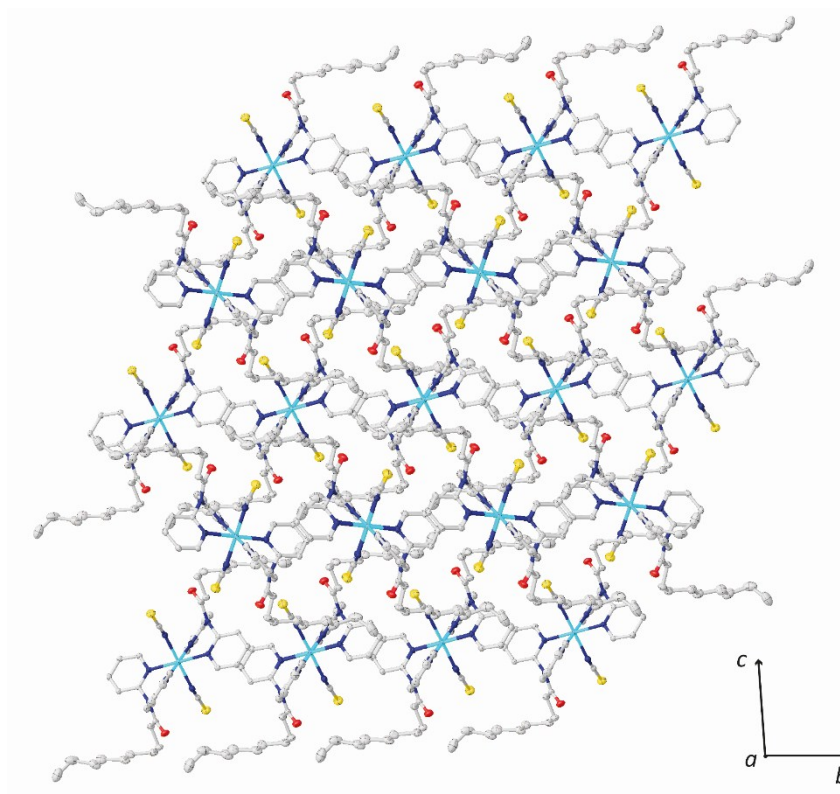

**Fig. S10** Packing of  $1C_{10}\cdot 140K$  as viewed down the  $a$  axis. Legend: iron, turquoise; nitrogen, blue; carbon, grey; oxygen, red; sulfur, yellow. This is representative of the packing found in  $1C_{10}\cdot 85K$  and  $1C_{10}\cdot 105K$ .

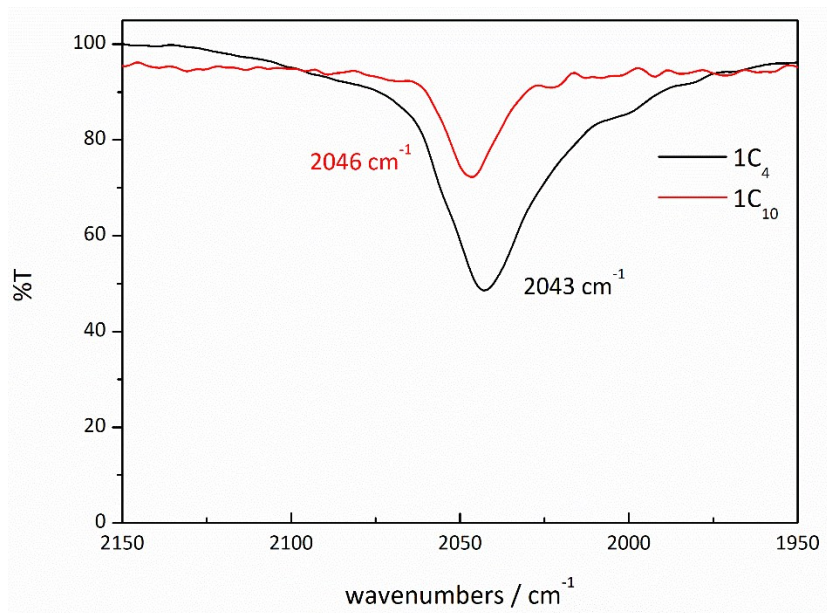

**Fig. S11** Partial IR absorption spectra for single crystals of  $1C_4$  (black) and  $1C_{10}$  (red) at 293 K.

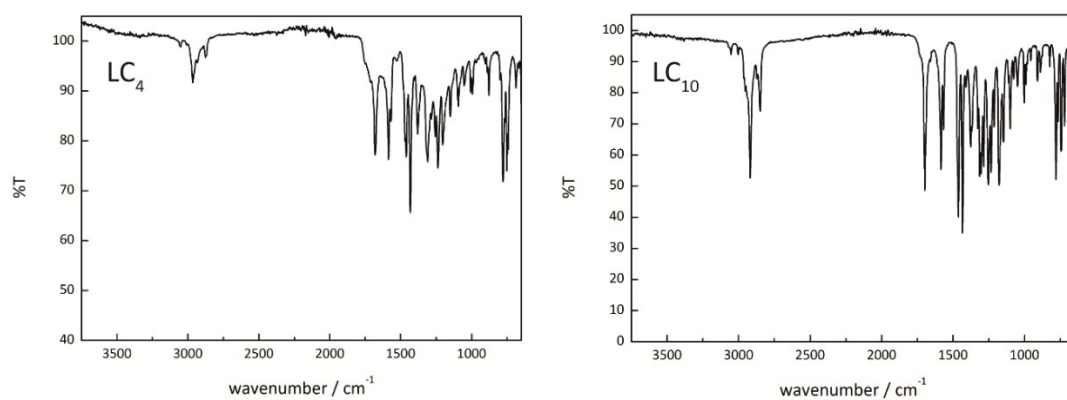

**Fig. S12** IR absorption spectra for  $LC_4$  (left) and  $LC_{10}$  (right) at room temperature.

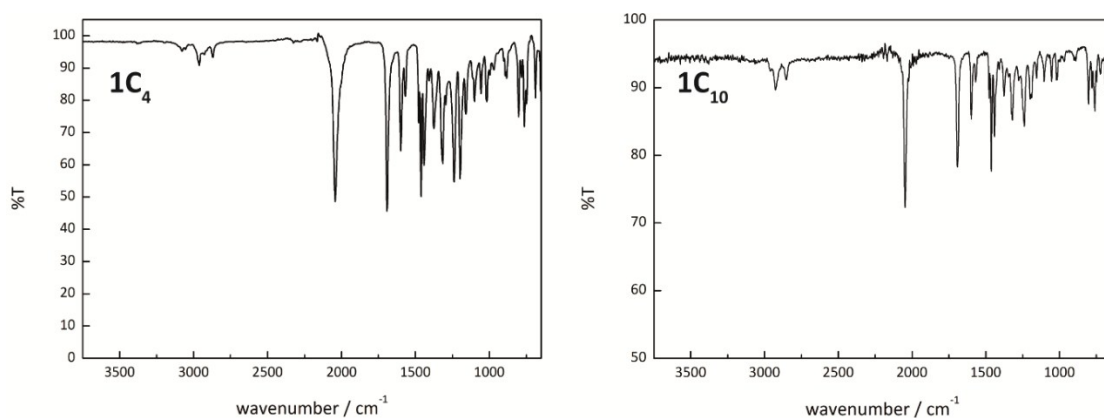

**Fig. S13** IR absorption spectra for  $1C_4$  (left) and  $1C_{10}$  (right) at room temperature.

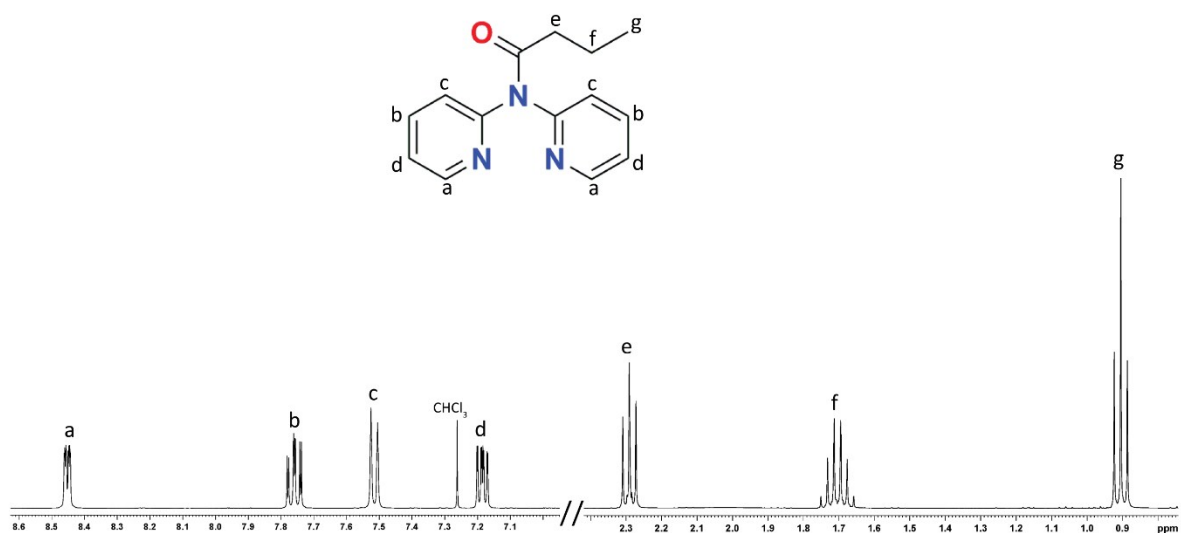

**Fig. S14** Partial <sup>1</sup>H NMR spectrum of the ligand *N,N*-di(pyridin-2-yl)butanamide (LC<sub>4</sub>) in CDCl<sub>3</sub>. Shifts given in ppm (x axis).

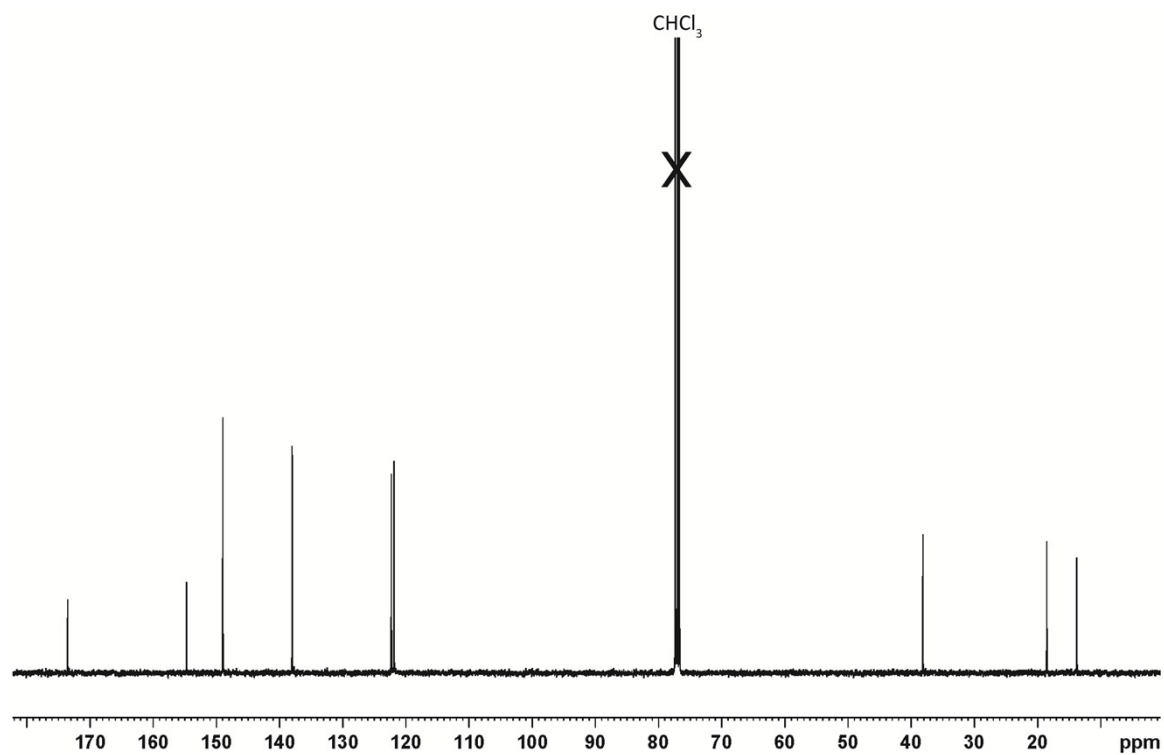

**Fig. S15** <sup>13</sup>C NMR spectrum of the ligand *N,N*-di(pyridin-2-yl)butanamide (LC<sub>4</sub>) in CDCl<sub>3</sub>.



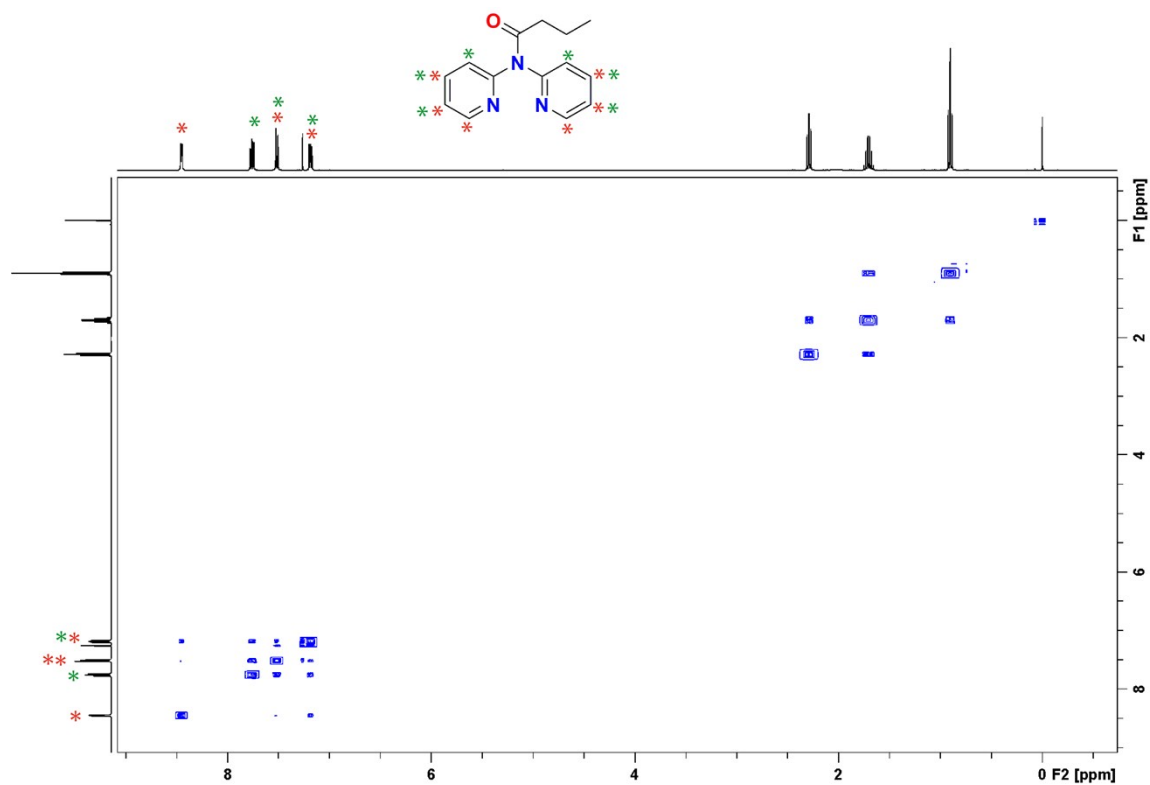

**Fig. S16** COSY NMR spectrum of the ligand *N,N*-di(pyridin-2-yl)butanamide (LC<sub>4</sub>) in CDCl<sub>3</sub>.

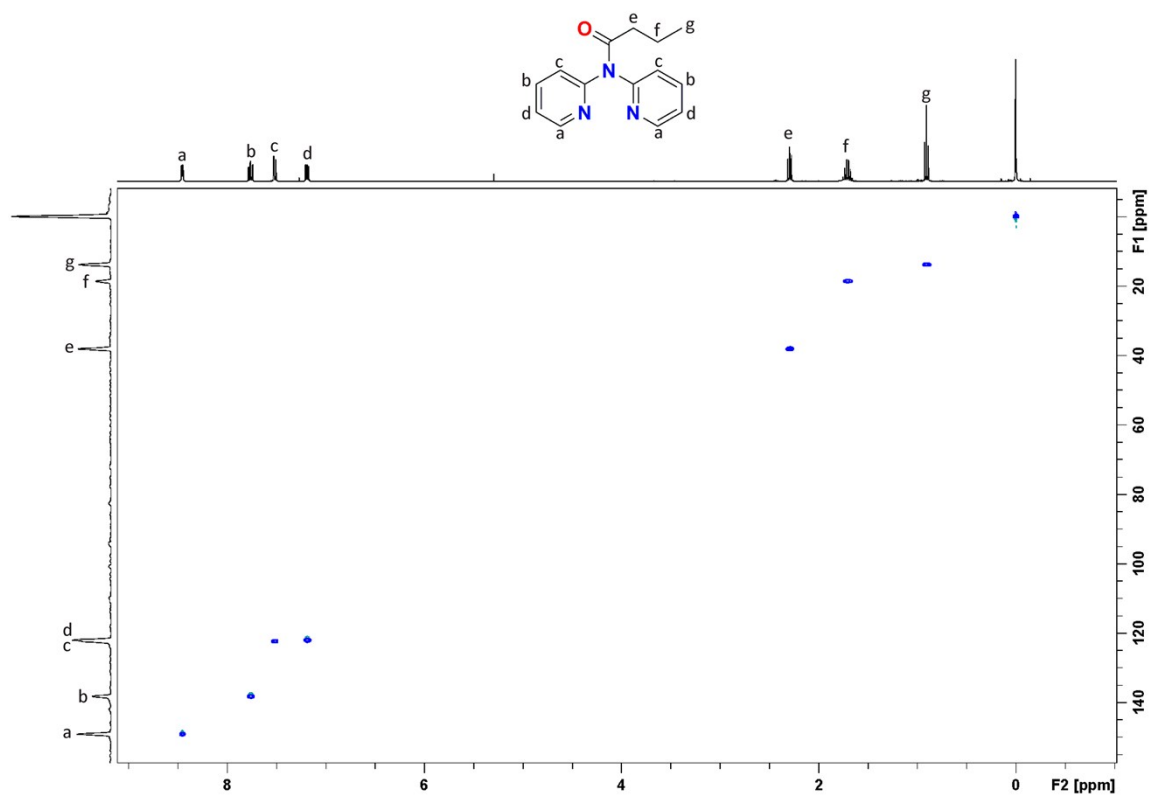

**Fig. S17** HSQC NMR spectrum of the ligand *N,N*-di(pyridin-2-yl)butanamide (LC<sub>4</sub>) in CDCl<sub>3</sub>.

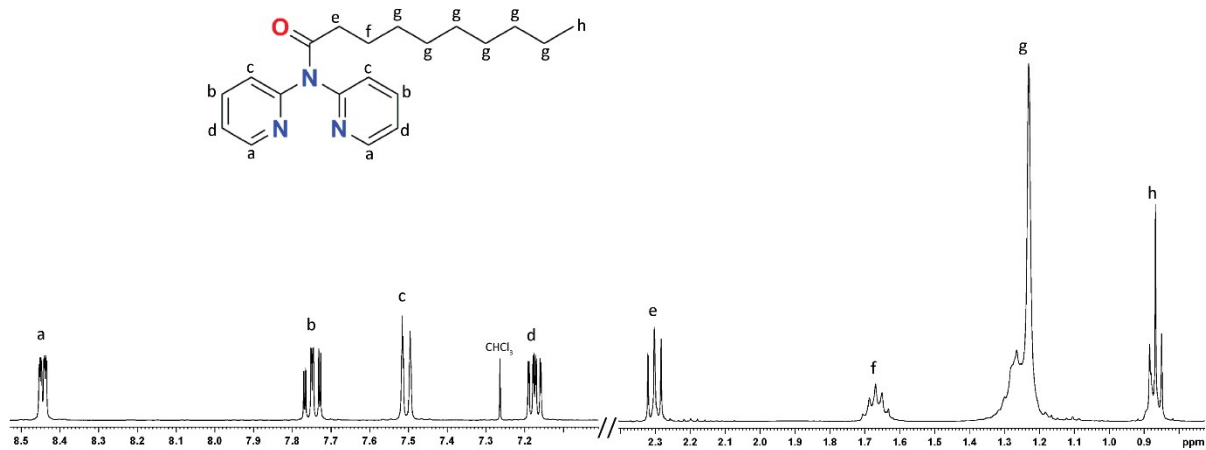

**Fig. S18** Partial <sup>1</sup>H NMR spectrum of the ligand *N,N*-di(pyridin-2-yl)decanamide (LC<sub>10</sub>) in CDCl<sub>3</sub>. Shifts given in ppm (x axis).

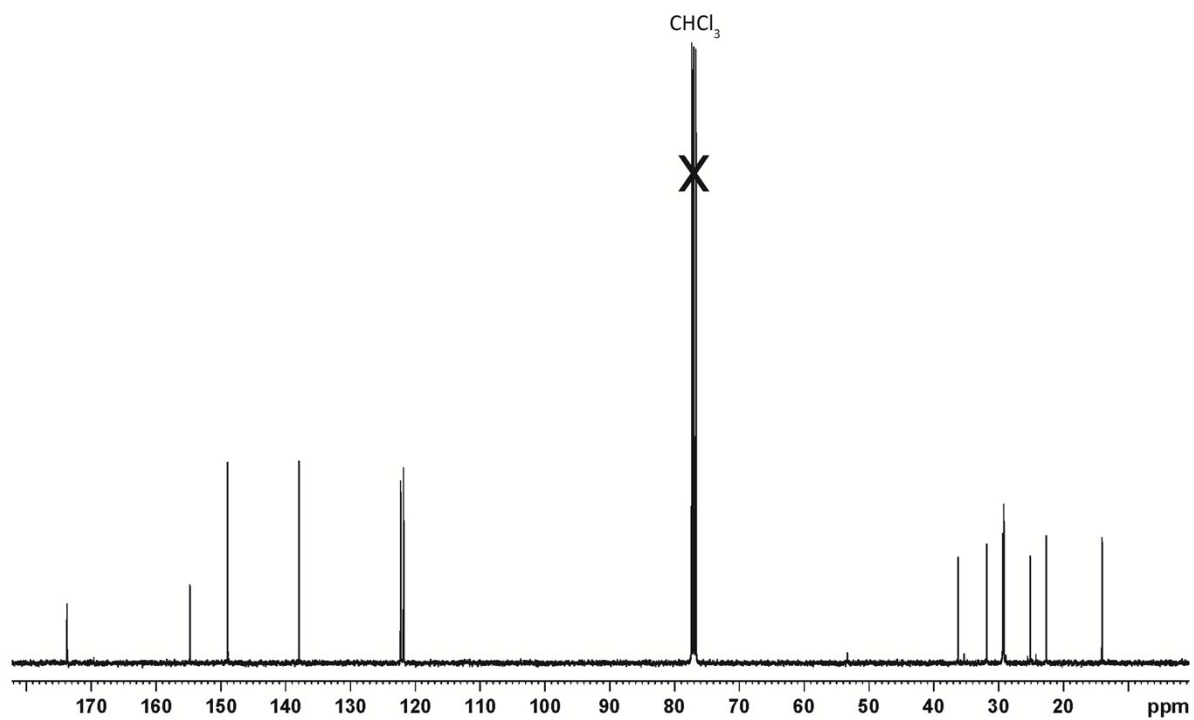

**Fig. S19** <sup>13</sup>C NMR spectrum of the ligand *N,N*-di(pyridin-2-yl)decanamide (LC<sub>10</sub>) in CDCl<sub>3</sub>.

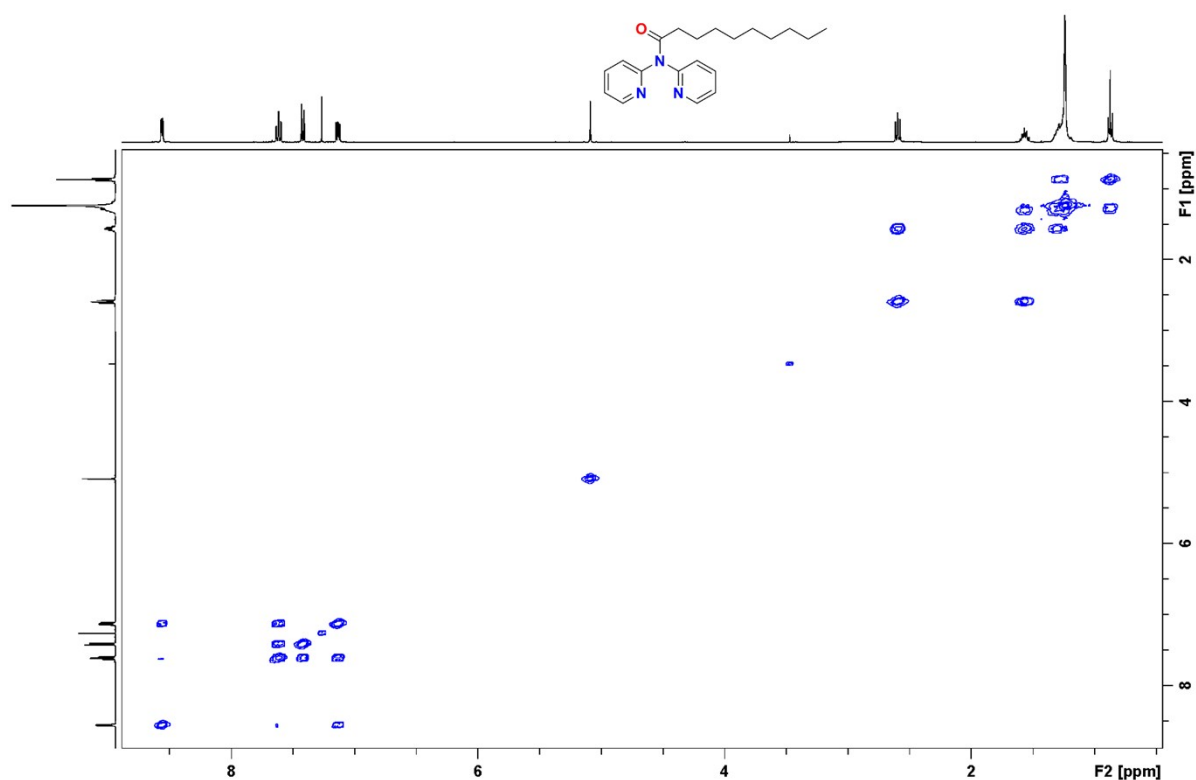

**Fig. S20** COSY NMR spectrum of the ligand *N,N*-di(pyridin-2-yl)decanamide (LC<sub>10</sub>) in CDCl<sub>3</sub>. For <sup>1</sup>H and <sup>13</sup>C assignments see Fig S19.

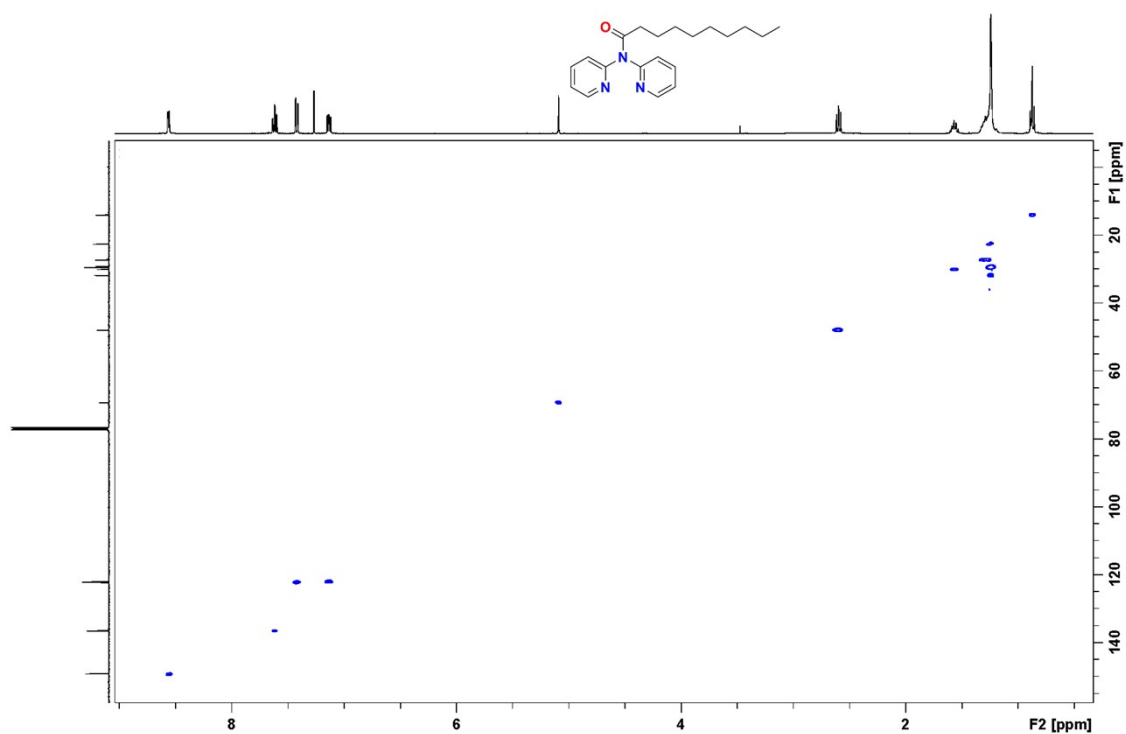

**Fig. S21** HSQC NMR spectrum of the ligand *N,N*-di(pyridin-2-yl)decanamide (LC<sub>10</sub>) in CDCl<sub>3</sub>. For <sup>1</sup>H and <sup>13</sup>C assignments see Fig S20.

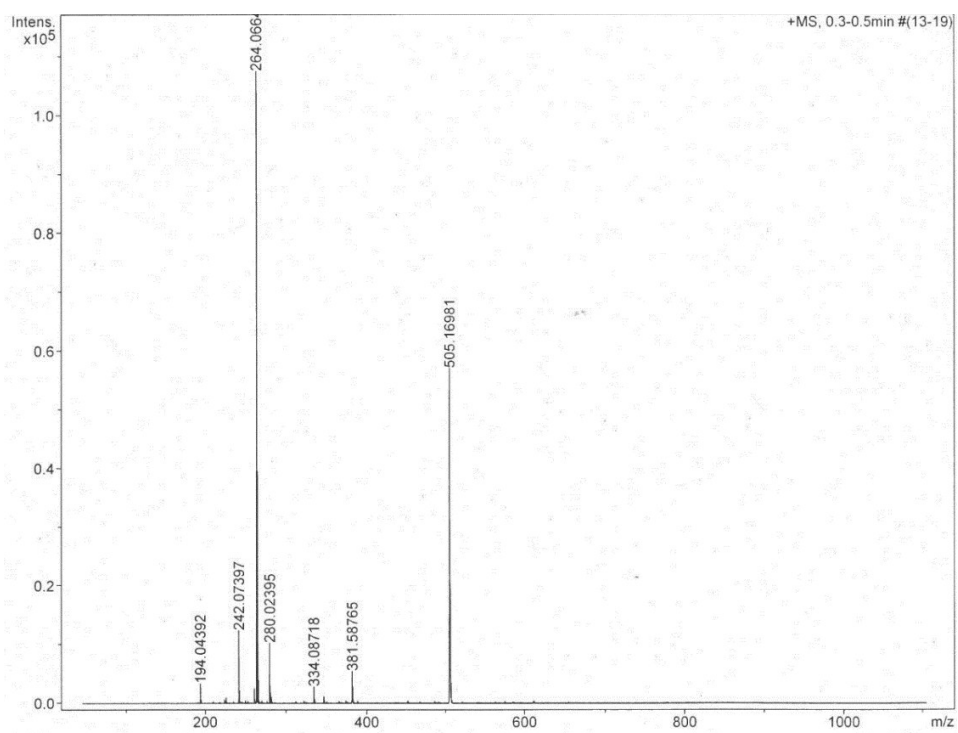

Fig. S22 Mass spectrum of LC<sub>4</sub>. ESI<sup>+</sup> MS, methanol as eluent.

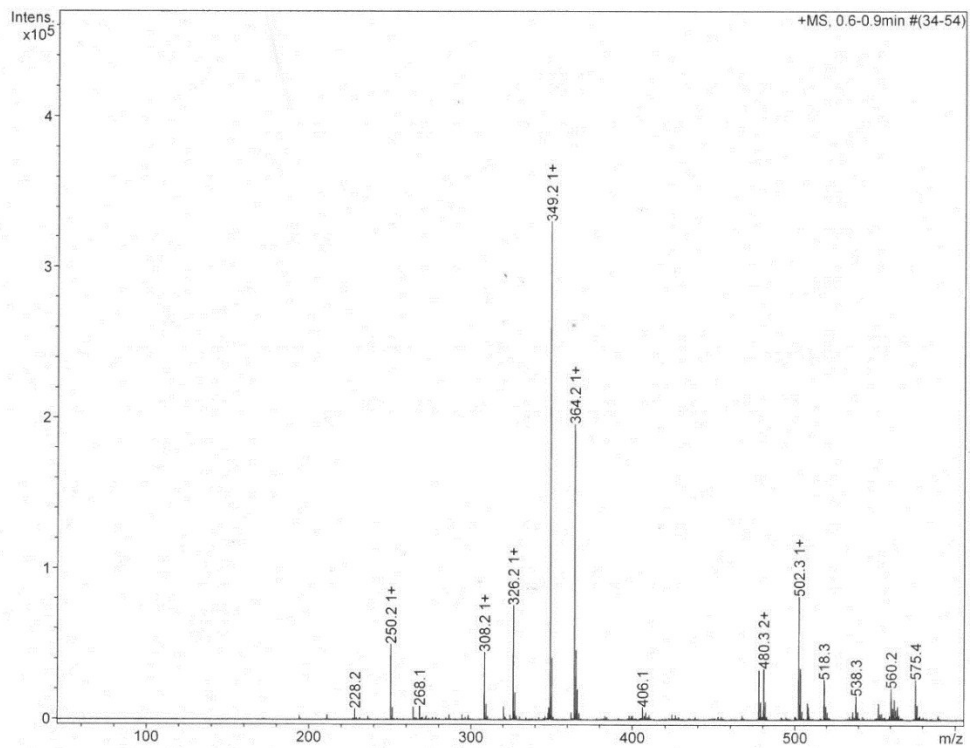

**Fig. S23** Mass spectrum of LC<sub>10</sub>. ESI<sup>+</sup> MS, methanol as eluent.
